# Supplementary material
Source: PubMed Central journal article supplement (PMC7114410)
Supplement: mmc2.pdf [file mmc2.pdf]

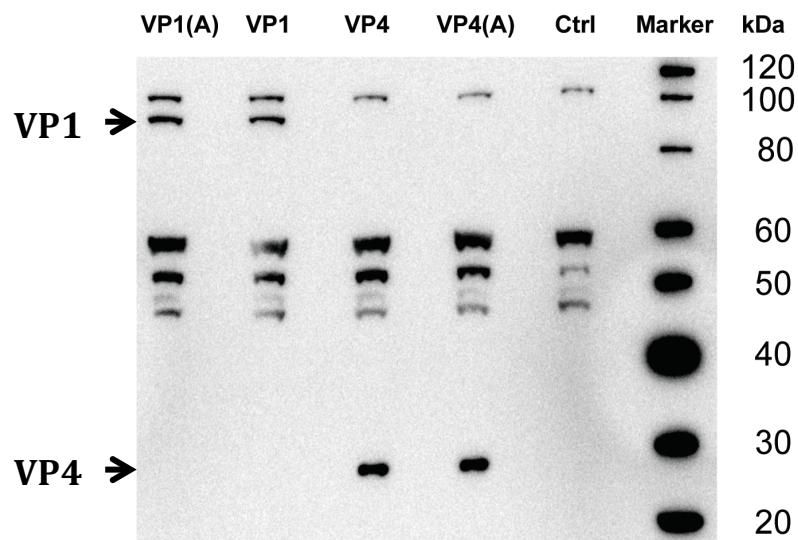

**Figure S2. Expression of IPNV proteins in TO- cells.**

TO- cells were transfected with expression constructs for the separate FLAG-tagged IPNV proteins, and harvested 48 h post transfection. Mutated constructs VP4K674A (VP4(A)) and VP1S163A (VP1(A)) were also expressed. Western blot analysis was used to detect the viral proteins using FLAG specific antibody.
